# Supplementary material for: Emission-dominated gas exchange of elemental mercury vapor over natural surfaces in China
Source: Copernicus journal article supplement (doi:10.5194/acp-2016-314), 2016-05-11
Supplement: Supplementary file 1 [file acp-2016-314-supplement.pdf]

1 **Emission-dominated gas exchange of elemental mercury vapor over natural surfaces in China**

2 Xun Wang<sup>1,2</sup>, Che-Jen Lin<sup>1,3,4,\*</sup>, Wei Yuan<sup>1,2</sup>, Jonas Sommar<sup>1</sup>, Wei Zhu<sup>1</sup>, Xinbin Feng<sup>1,\*</sup>

3

4 <sup>1</sup> State Key Laboratory of Environmental Geochemistry, Institute of Geochemistry, Chinese  
5 Academy of Sciences, Guiyang, China

6 <sup>2</sup>University of Chinese Academy of Sciences, Beijing, China

7 <sup>3</sup>Center for Advances in Water and Air Quality, Lamar University, Beaumont, TX, USA

8 <sup>4</sup>Department of Civil and Environmental Engineering, Lamar University, Beaumont, TX, USA

9

10 **\* Corresponding Authors:**

11 Xinbin Feng

Che-Jen Lin

12 Phone: +86-851-5895728

Phone: (409) 880-8761

13 Fax: +86-851-5891609

Fax: (409) 880-8121

14 Email: [fengxinbin@vip.skleg.cn](mailto:fengxinbin@vip.skleg.cn)

E-mail: Jerry.Lin@lamar.edu

15

16 S1 An unpublished Hg concentration dataset

17 An unpublished Hg concentration dataset was collected in China in autumn of 2013 and 2014.  
18 This dataset includes Hg concentration in litterfall collected under 5 predominant tree species in 4  
19 national subtropical evergreen forests (Xishuangbanna: 21.68 N, 101.42 E; Jianfengling: 19.18 N,  
20 109.73 E; Shenlongjia: 31.45 N, 109.91 E; Mt. Wuyi: 28.04 N, 117.57 E) and 4 national temperate  
21 forests (Jixian: 36.16 N, 110.73E; Mt. Xiaolong: 34.35 N, 106.01 E; Mt. Xiaoxinganling: 47.17 N,  
22 128.95 E; Mt. Taihang: 34.96 N, 112.4 E). The collection of litter samples, measurement of Hg  
23 concentration and the quality control procedure have been described elsewhere (Zhou et al., 2013).  
24 Briefly, litterfall samples were collected by 1 m × 1 m nylon nets (1 mm pore size) placed under  
25 canopy. Hg concentration in litter was measured by a Lumex RA-915+ multifunctional Hg analyzer  
26 equipped with a pyrolysis attachment.

27

28 S2 Monte Carlo simulation for Hg input through litterfall in China

29 Monte Carlo simulation is a modeling technique that relies on random sampling and  
30 statistical data analysis (Raychaudhuri, 2008). In this study, Monte Carlo simulation was  
31 applied to integrate the datasets of Hg concentration in litterfall and litterfall biomass to  
32 produce the probabilistic Hg flux through litterfall. The simulation was carried out in 3  
33 steps: creating statistical distribution using the observational data, perform random  
34 sampling, and flux calculation. In the first step, Hg concentration in litters and litterfall  
35 biomass production are regarded as random variables:

36 
$$Hg_i(\theta) = f_\theta(x_1, x_2, \dots, x_n | \theta)$$

37 
$$Biomass_i(\beta) = f_\beta(x_1, x_2, \dots, x_n | \beta)$$

38 where  $\theta$  is a random variable vector for Hg concentrations in  $i$  group ( $\text{ng g}^{-1}$ );  $\beta$  is the  
39 random variable vector for litterfall biomass production in  $i$  group ( $\text{g m}^{-2} \text{yr}^{-1}$ ). Function  $f$   
40 represents the associated probability density function. As such,  $F_\theta$  and  $F_\beta$  represent the  
41 respective cumulative probability distribution functions.

42 After determining the respective probability density functions of the data, an inverse

43 transformation method was utilized to generate a random sample from the probability  
 44 density distribution (Raychaudhuri, 2008). For example, the random sample for Hg  
 45 concentration (X) is generated by:

46 Generating:  $U \sim U(0,1)$ .

47 Returning:  $X = F_{\theta}^{-1}(U)$ .

48 Therefore, the random variable of Hg deposition flux caused by litterfall The  
 49 calculation for the Hg mass input through litterfall can be described as:

50 
$$X_{\theta,i} \sim F_{\theta}^{-1}$$

51 
$$X_{\beta,i} \sim F_{\beta}^{-1}$$

52 *if  $X_{\theta,i} > 0$  &  $X_{\beta,i} > 0$  then*

53 
$$Flux = \begin{cases} X_{\theta,i}X_{\beta,i} & i \neq \text{mixed forests} \\ X_{\theta,green}r_{green}X_{\beta,mixed} + X_{\theta,deciduous}(1 - r_{green})X_{\beta,mixed} \end{cases}$$

54 where  $r_{green}$  was the ratio for the green tree species in mixed forests and was assumed as  
 55 0.5. After 50,000 sampling iterations, the descriptive statistics and the 95% confidence  
 56 interval (CI) of  $L_i$  were calculated from the probability distribution of  $L_i$ . The Monte Carlo  
 57 simulation and Hg flux calculation was performed using MATLAB 2013a.

58 Table S1 Orthogonal Design (  $L_{25}(5^6)$ ) for WRF

59

| Run Times | MP | CU | R | PBL |
|-----------|----|----|---|-----|
| 1         | 8  | 5  | 3 | 2   |
| 2         | 8  | 1  | 4 | 1   |
| 3         | 8  | 2  | 1 | 8   |
| 4         | 8  | 3  | 5 | 7   |
| 5         | 8  | 84 | 7 | 12  |
| 6         | 6  | 5  | 4 | 8   |
| 7         | 6  | 1  | 1 | 7   |
| 8         | 6  | 2  | 5 | 12  |
| 9         | 6  | 3  | 7 | 2   |
| 10        | 6  | 84 | 3 | 1   |
| 11        | 3  | 5  | 1 | 12  |
| 12        | 3  | 1  | 5 | 2   |
| 13        | 3  | 2  | 7 | 1   |
| 14        | 3  | 3  | 3 | 8   |
| 15        | 3  | 84 | 4 | 7   |
| 16        | 4  | 5  | 5 | 1   |
| 17        | 4  | 1  | 7 | 8   |
| 18        | 4  | 2  | 3 | 7   |
| 19        | 4  | 3  | 4 | 12  |
| 20        | 4  | 84 | 1 | 2   |
| 21        | 2  | 5  | 7 | 7   |
| 22        | 2  | 1  | 3 | 12  |
| 23        | 2  | 2  | 4 | 2   |
| 24        | 2  | 3  | 1 | 1   |
| 25        | 2  | 84 | 5 | 8   |

60

61 where MP: Microphysics Options, 8 means Thompson, 6 means WSM6, 3 means WSM3,  
 62 4 means WSM5, 2 means Lin scheme.

63 CU: Cumulus Parameterization Options; 1 means Kain-Fritsch; 2 means Betts-Miller-  
 64 Janjic; 3 means Grell-Freitas; 5 means Grell-3; 84 means New SAS (HWRF).

65 R: Radiation Physics Options; 1 means Dudhia for ra\_sw\_physics and RRTM for  
 66 ra\_lw\_physics ; 3 means CAM; 4 means RRTMG; 5 means New Goddard; 7 means  
 67 FLG.

68 PBL: PBL Physics Options; 1 means YSU; 2 means MYJ; 7 means ACM2; 8 means  
 69 BouLac; 12 means GBM.

70

71 Table S2 peer-reviewed air-surfaces fluxes data. W means warm season (May-October), and C  
 72 means cold season (November-April).  
 73

| Term              | Lon     | Lat     | Type | Flux (ng m <sup>-2</sup> h <sup>-1</sup> ) | Refencens             |
|-------------------|---------|---------|------|--------------------------------------------|-----------------------|
| Paddy             | 106.471 | 26.556  | W    | 27.4                                       | (Wang et al., 2004)   |
| Paddy             | 106.471 | 26.556  | C    | 5.6                                        | (Wang et al., 2004)   |
| Agricultural land | 102.115 | 29.648  | C    | -4.1                                       | (Fu et al., 2008)     |
| Agricultural land | 102.115 | 29.648  | W    | 19.2                                       | (Fu et al., 2008)     |
| Agricultural land | 102.115 | 29.648  | W    | 21.1                                       | (Fu et al., 2008)     |
| Agricultural land | 102.115 | 29.648  | C    | -3.1                                       | (Fu et al., 2008)     |
| Agricultural land | 102.088 | 29.680  | W    | 2.9                                        | (Fu et al., 2008)     |
| Agricultural land | 102.088 | 29.680  | C    | 1.5                                        | (Fu et al., 2008)     |
| Agricultural land | 102.088 | 29.680  | W    | 2.1                                        | (Fu et al., 2008)     |
| Agricultural land | 102.225 | 29.787  | W    | 132                                        | (Fu et al., 2008)     |
| Agricultural land | 102.168 | 29.607  | W    | 24.5                                       | (Fu et al., 2008)     |
| Agricultural land | 102.115 | 29.648  | W    | 20.4                                       | (Fu et al., 2008)     |
| Agricultural land | 112.47  | 23.014  | C    | 32.1                                       | (Fu et al., 2012)     |
| Grassland         | 112.852 | 22.997  | C    | 114                                        | (Fu et al., 2012)     |
| Agricultural land | 113.082 | 22.534  | C    | 23.8                                       | (Fu et al., 2012)     |
| Grassland         | 113.706 | 22.82   | C    | 75.6                                       | (Fu et al., 2012)     |
| Grassland         | 114.457 | 23.116  | C    | 24.4                                       | (Fu et al., 2012)     |
| Grassland         | 113.542 | 23.859  | C    | 44.8                                       | (Fu et al., 2012)     |
| Agricultural land | 113.569 | 24.703  | C    | 18.2                                       | (Fu et al., 2012)     |
| Agricultural land | 112.87  | 23.022  | C    | 135                                        | (Fu et al., 2012)     |
| Agricultural land | 112.422 | 23.13   | C    | 14.2                                       | (Fu et al., 2012)     |
| Agricultural land | 112.68  | 22.336  | C    | 10.7                                       | (Fu et al., 2012)     |
| Agricultural land | 112.924 | 21.874  | C    | 2.7                                        | (Fu et al., 2012)     |
| Agricultural land | 113.893 | 23.407  | C    | 1.4                                        | (Fu et al., 2012)     |
| Agricultural land | 113.639 | 24.712  | C    | 22.8                                       | (Fu et al., 2012)     |
| wheat             | 116.600 | 36.950  | W    | 61.2                                       | (Sommar et al., 2013) |
| Agricultural land | 29.921  | 106.370 | W    | 31                                         | (Zhu et al., 2011)    |
| Agricultural land | 29.921  | 106.370 | W    | 15.1                                       | (Zhu et al., 2011)    |
| Paddy             | 106.370 | 29.921  | W    | 20.6                                       | (Zhu et al., 2013)    |
| Paddy             | 106.437 | 29.757  | W    | 4.63                                       | (Zhu et al., 2013)    |
| wheat             | 116.600 | 36.950  | W    | 7.6                                        | (Zhu et al., 2015)    |
| wheat             | 116.600 | 36.950  | C    | 2.2                                        | (Zhu et al., 2015)    |
| wheat             | 116.600 | 36.950  | W    | 7.2                                        | (Zhu et al., 2015)    |
| wheat             | 116.600 | 36.950  | C    | 5.3                                        | (Zhu et al., 2015)    |
| wheat             | 116.600 | 36.950  | W    | 10.8                                       | (Zhu et al., 2015)    |
| wheat             | 116.600 | 36.950  | C    | 9.3                                        | (Zhu et al., 2015)    |

|                         |         |        |   |       |                     |
|-------------------------|---------|--------|---|-------|---------------------|
| wheat                   | 116.600 | 36.950 | W | 17.3  | (Zhu et al., 2015)  |
| Longtanzi reservoir     | 106.400 | 29.817 | W | 43.75 | (Wang et al., 2006) |
| Jialing river           | 106.433 | 29.833 | C | 6.7   | (Wang et al., 2006) |
| Hongfeng reservoir      | 106.471 | 26.556 | W | 6.5   | (Feng et al., 2008) |
| Hongfeng reservoir      | 106.471 | 26.556 | C | 5.1   | (Feng et al., 2008) |
| Hongfeng reservoir      | 106.471 | 26.556 | C | 1.8   | (Feng et al., 2008) |
| Hongfeng reservoir      | 106.471 | 26.556 | W | 4.8   | (Feng et al., 2008) |
| Hongfeng reservoir      | 106.471 | 26.556 | W | 4     | (Feng et al., 2008) |
| Hongfeng reservoir      | 106.471 | 26.556 | C | 2.8   | (Feng et al., 2008) |
| Hongfeng reservoir      | 106.471 | 26.556 | C | 2     | (Feng et al., 2008) |
| Baihua Reservoir        | 106.531 | 26.689 | C | 3     | (Feng et al., 2004) |
| Baihua Reservoir        | 106.531 | 26.689 | W | 6.39  | (Feng et al., 2004) |
| Baihua Reservoir        | 106.531 | 26.689 | W | 7.43  | (Feng et al., 2004) |
| Baihua Reservoir        | 106.531 | 26.689 | W | 6.62  | (Feng et al., 2004) |
| Wujiang reservoir       | 106.785 | 27.312 | W | 20.1  | (Fu et al., 2010)   |
| Wujiang reservoir WJD-1 | 106.785 | 27.312 | C | 6.2   | (Fu et al., 2010)   |
| Wujiang reservoir       | 106.785 | 27.312 | W | 14.1  | (Fu et al., 2010)   |
| Wujiang reservoir WJD-2 | 106.785 | 27.312 | C | 4.7   | (Fu et al., 2010)   |
| Wujiang reservoir       | 106.785 | 27.312 | W | 9.9   | (Fu et al., 2010)   |
| Wujiang reservoir WJD-3 | 106.785 | 27.312 | C | 3.2   | (Fu et al., 2010)   |
| Wujiang reservoir       | 106.769 | 27.321 | W | 4.1   | (Fu et al., 2010)   |
| Wujiang reservoir SFY-1 | 106.769 | 27.321 | C | 1     | (Fu et al., 2010)   |
| Wujiang reservoir       | 106.769 | 27.321 | W | 1.5   | (Fu et al., 2010)   |
| Wujiang reservoir SFY-2 | 106.769 | 27.321 | C | 0.6   | (Fu et al., 2010)   |
| Wujiang reservoir       | 106.769 | 27.321 | W | 4.4   | (Fu et al., 2010)   |

|                              |         |         |   |      |                     |
|------------------------------|---------|---------|---|------|---------------------|
| Wujiang reservoir<br>SFY-3   | 106.769 | 27.321  | C | 1.3  | (Fu et al., 2010)   |
| Puding reservoir             | 105.791 | 26.274  | W | 2.2  | (Fu et al., 2010)   |
| Puding reservoir             | 105.791 | 26.274  | C | 0    | (Fu et al., 2013b)  |
| Puding reservoir             | 105.791 | 26.274  | W | 4.2  | (Fu et al., 2013b)  |
| Puding reservoir             | 105.791 | 26.274  | C | 0.2  | (Fu et al., 2013b)  |
| HJD-1                        | 104.114 | 37.550  | W | 4.2  | (Fu et al., 2013b)  |
| HJD-3                        | 104.114 | 37.550  | W | 4.2  | (Fu et al., 2013b)  |
| HJD-1                        | 104.114 | 37.550  | C | 3.1  | (Fu et al., 2013a)  |
| HJD-2                        | 104.114 | 37.550  | C | 2.7  | (Fu et al., 2013a)  |
| HJD-3                        | 104.114 | 37.550  | C | 2.1  | (Fu et al., 2013a)  |
| YZD-1                        | 105.792 | 26.648  | W | 4    | (Fu et al., 2013a)  |
| YZD-2                        | 105.792 | 26.648  | W | 3.9  | (Fu et al., 2013a)  |
| YZD-3                        | 105.792 | 26.648  | W | 4    | (Fu et al., 2013a)  |
| YZD-1                        | 105.792 | 26.648  | C | 0.1  | (Fu et al., 2013a)  |
| YZD-2                        | 105.792 | 26.648  | C | 0.4  | (Fu et al., 2013a)  |
| YZD-3                        | 105.792 | 26.648  | C | 1    | (Fu et al., 2013a)  |
| DF Reservoir                 | 106.180 | 26.859  | W | 3.6  | (Fu et al., 2013a)  |
| DF Reservoir                 | 106.180 | 26.859  | W | 4.3  | (Fu et al., 2013a)  |
| DF Reservoir                 | 106.180 | 26.859  | W | 3.3  | (Fu et al., 2013a)  |
| DF Reservoir                 | 106.180 | 26.859  | C | 0.7  | (Fu et al., 2013a)  |
| DF Reservoir                 | 106.180 | 26.859  | C | 0.9  | (Fu et al., 2013a)  |
| SFY Reservoir                | 106.769 | 27.321  | C | 3.7  | (Fu et al., 2013a)  |
| SFY Reservoir                | 106.769 | 27.321  | C | 2.3  | (Fu et al., 2013a)  |
| SFY Reservoir                | 106.769 | 27.321  | W | 4.3  | (Fu et al., 2013a)  |
| SFY Reservoir                | 106.769 | 27.321  | C | 1.3  | (Fu et al., 2013a)  |
| SFY Reservoir                | 106.769 | 27.321  | C | 1.2  | (Fu et al., 2013a)  |
| SFY Reservoir                | 106.769 | 27.321  | C | 1.3  | (Fu et al., 2013a)  |
| East China sea<br>shore soil | 121.898 | 31.054  | C | 3.2  | Zhu et al., 2013AEa |
| East China sea<br>shore soil | 121.898 | 31.054  | C | -1.4 | Zhu et al., 2013AEa |
| Subtropical forest<br>soil   | 23.178  | 112.544 | C | 6.6  | (Fu et al., 2012)   |
| Subtropical forest<br>soil   | 102.020 | 29.703  | W | 6.6  | (Fu et al., 2008)   |
| Subtropical forest<br>soil   | 102.143 | 29.420  | W | 5.7  | (Fu et al., 2008)   |
| Subtropical forest<br>soil   | 102.111 | 29.628  | W | 9.3  | (Fu et al., 2008)   |

|                         |          |        |   |       |                     |
|-------------------------|----------|--------|---|-------|---------------------|
| Subtropical forest soil | 102.063  | 29.603 | W | 7.7   | (Fu et al., 2008)   |
| Subtropical forest soil | 102.030  | 29.588 | W | 0.5   | (Fu et al., 2008)   |
| Subtropical forest soil | 101.930  | 29.583 | W | 2.9   | (Fu et al., 2008)   |
| Subtropical forest soil | 106.656  | 29.609 | C | 0.3   | (Du et al., 2014)   |
| Subtropical forest soil | 106.283  | 29.833 | W | 14.2  | (Ma et al., 2013)   |
| Subtropical forest soil | 106.283  | 29.833 | W | 20.7  | (Ma et al., 2013)   |
| Simianshan forest soil  | 106.4333 | 28.583 | W | 7.7   | (Wang et al., 2006) |
| Geleshan forest soil    | 106.417  | 29.567 | W | 3.4   | (Wang et al., 2006) |
| Jinyunshan forest soil  | 106.367  | 29.933 | W | 8.4   | (Wang et al., 2006) |
| Changbai forest         | 128.112  | 42.402 | W | 2.7   | (Fu et al., 2015)   |
| Forest soil             | 125.299  | 43.850 | W | 7.6   | (Fang et al., 2003) |
| Forest soil             | 125.467  | 43.780 | W | 5.6   | (Fang et al., 2003) |
| Forest soil             | 125.467  | 43.780 | W | 3.3   | (Fang et al., 2003) |
| Grassland               | 102.115  | 29.648 | C | -18.7 | (Fu et al., 2008)   |
| Grassland               | 102.115  | 29.648 | C | 3.1   | (Fu et al., 2008)   |
| Grassland               | 102.115  | 29.648 | W | 13.4  | (Fu et al., 2008)   |
| Grassland               | 102.115  | 29.648 | W | 12.3  | (Fu et al., 2008)   |
| Grassland               | 102.115  | 29.648 | W | -1.7  | (Fu et al., 2008)   |
| Grassland               | 106.731  | 26.512 | W | 58.9  | (Feng et al., 2005) |
| Grassland               | 106.734  | 26.576 | W | 15.4  | (Feng et al., 2005) |
| Grassland               | 106.798  | 26.533 | W | 7.9   | (Feng et al., 2005) |
| Grassland               | 106.798  | 26.533 | C | 2.4   | (Feng et al., 2005) |
| Grassland               | 106.798  | 26.533 | W | 12.2  | (Feng et al., 2005) |



75

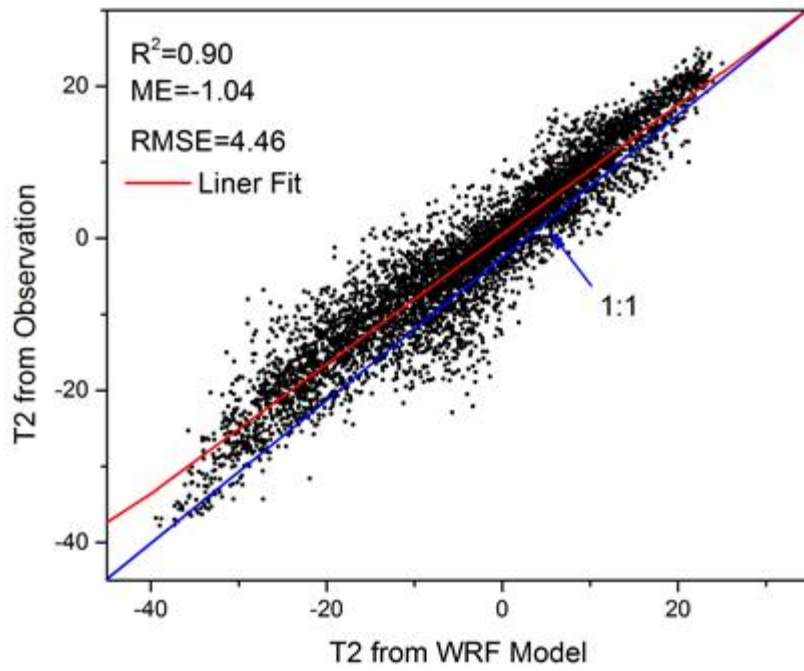

76

77

Figure S1 The simulated T2 (air temperature above 2 m) by WRF .vs the observed T2.

78

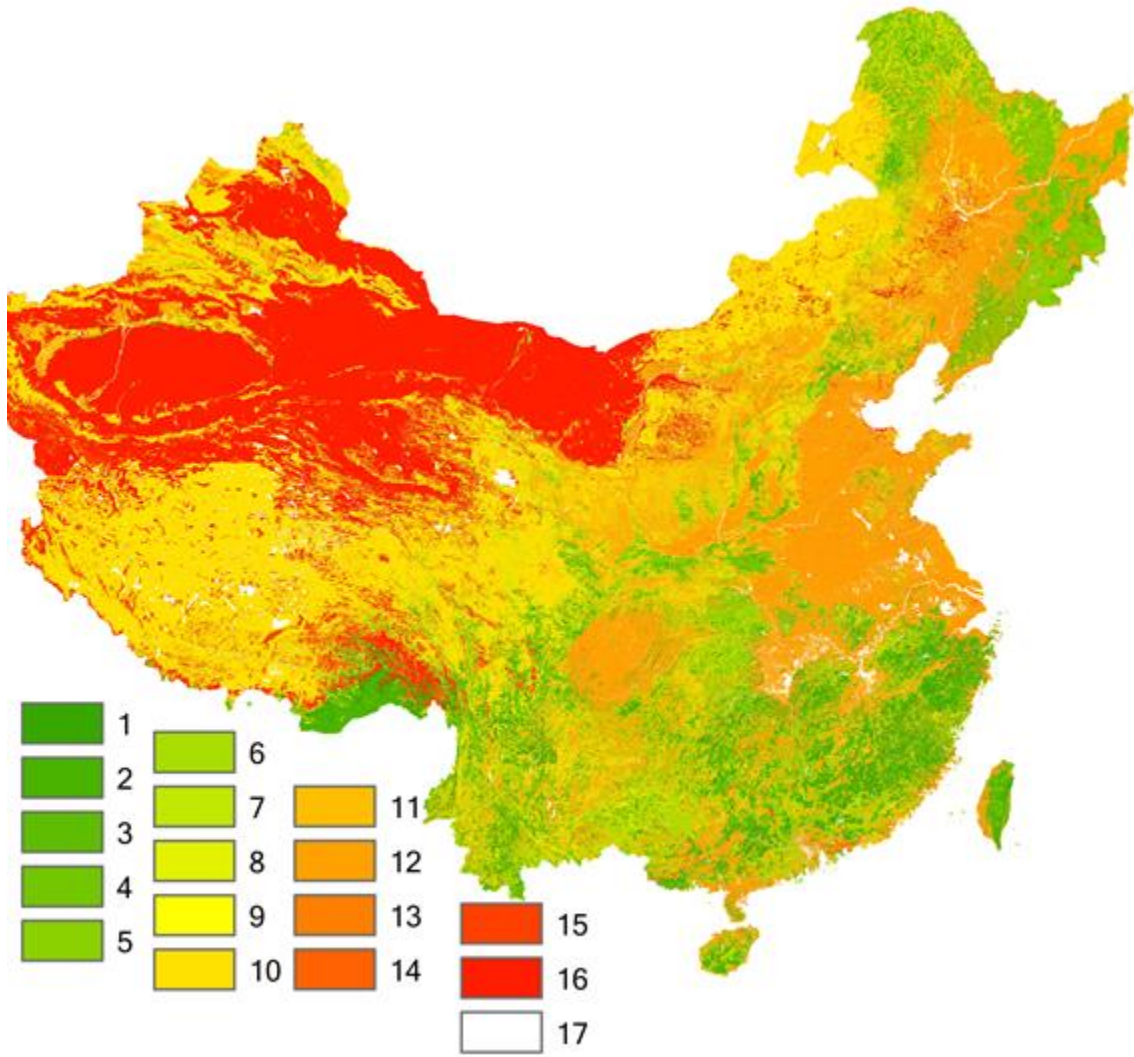

79

80 Figure S2 The spatial distribution of landuse in China. 1-17 means C1-C17.

81

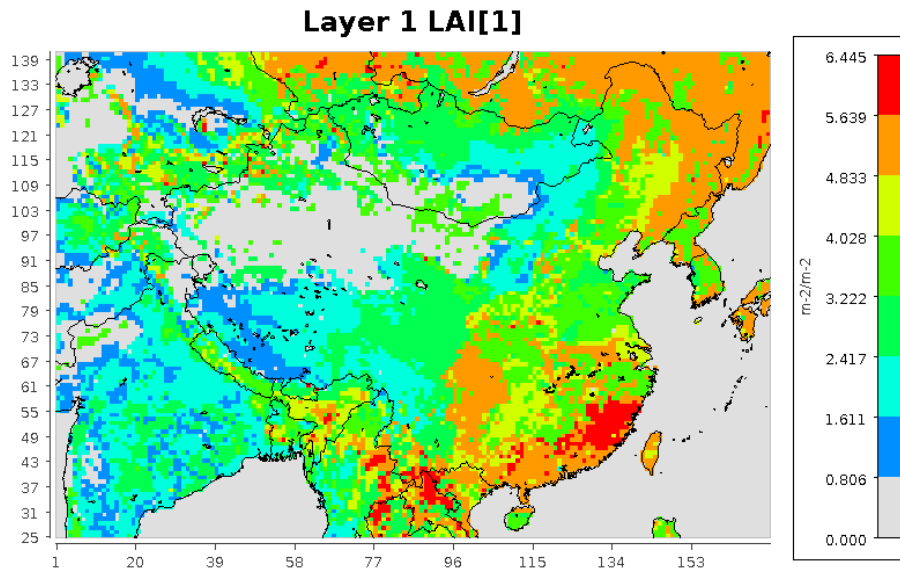

82  
 83 Figure S3 The spatial of mean LAI during summertime  
 84  
 85

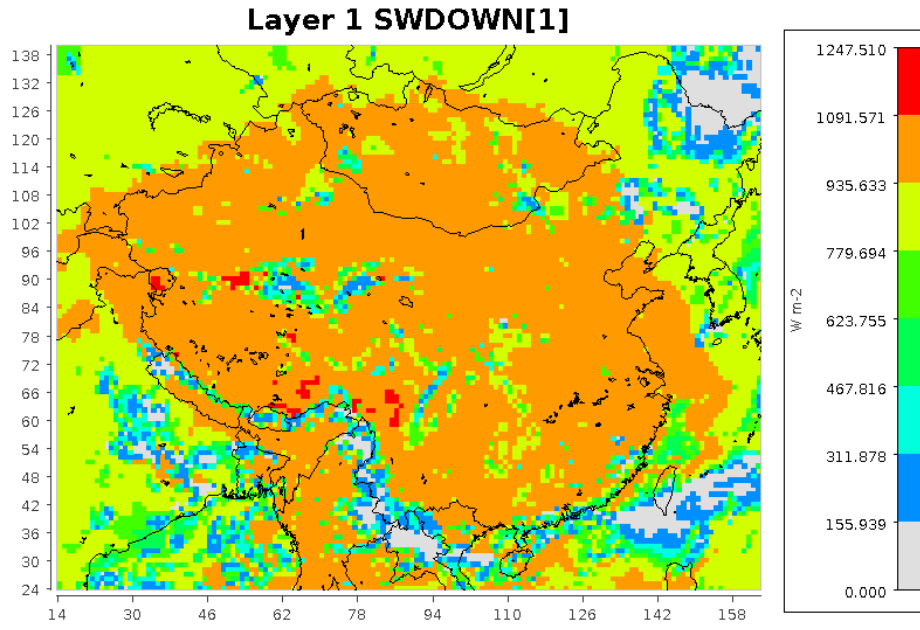

86

87 Figure S4 The spatial distribution of mean solar radiation at 14:00 during summertime.

88

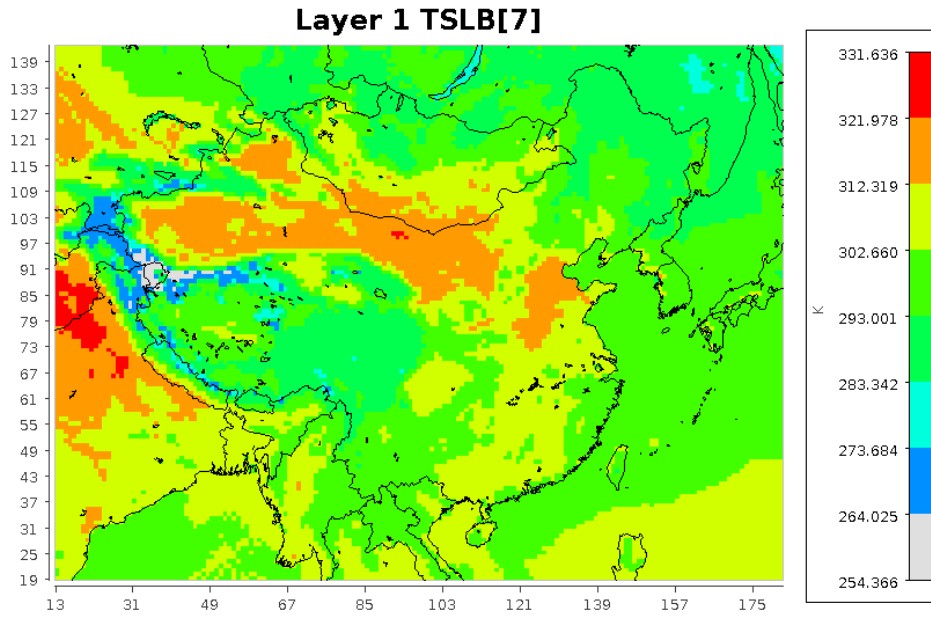

Min (40, 89) = 258.448, Max (20, 77) = 326.033

89

90 Figure S5 The spatial distribution of mean soil temperature at 14:00 during summertime.

91

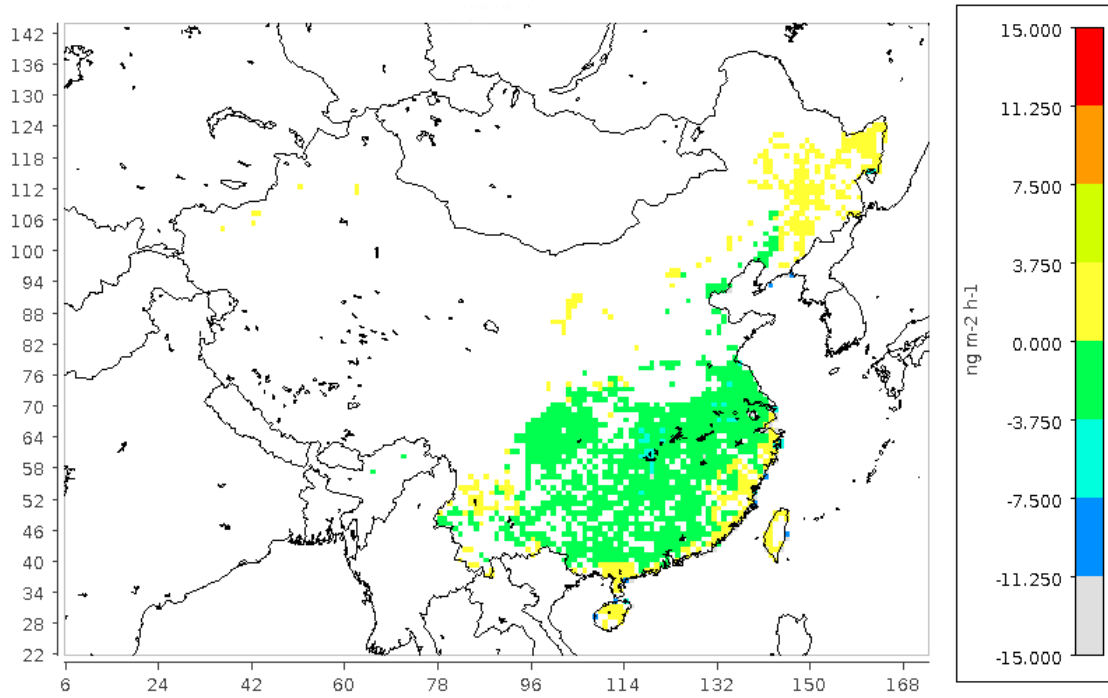

Min (115, 36) = -41.950, Max (162, 116) = 2.129

92

93 Figure S6. The simulated mean fluxes ( $\text{ng m}^{-2} \text{h}^{-1}$ ) from rice paddy during Apr-Oct.

94

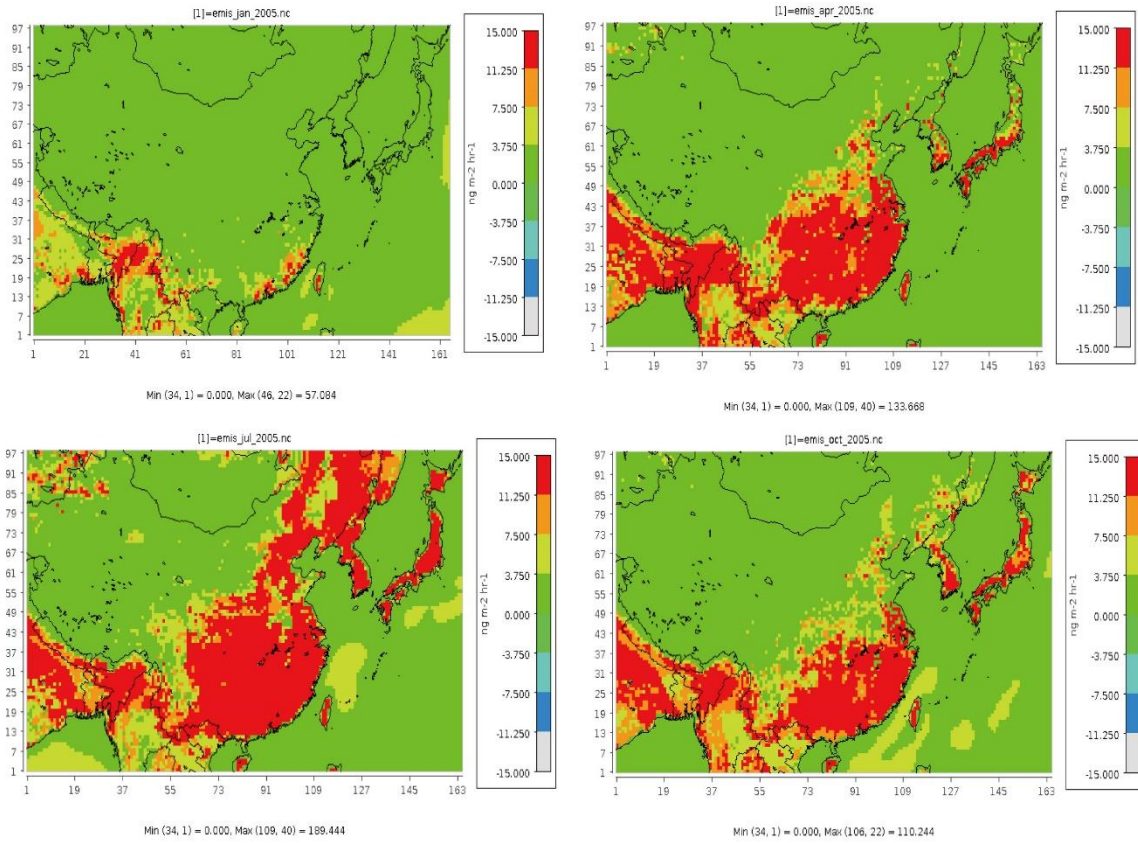

95

96 Figure S7 The simulated air-surfaces Hg<sup>0</sup> fluxes in East Asia (Shetty et al., 2008).

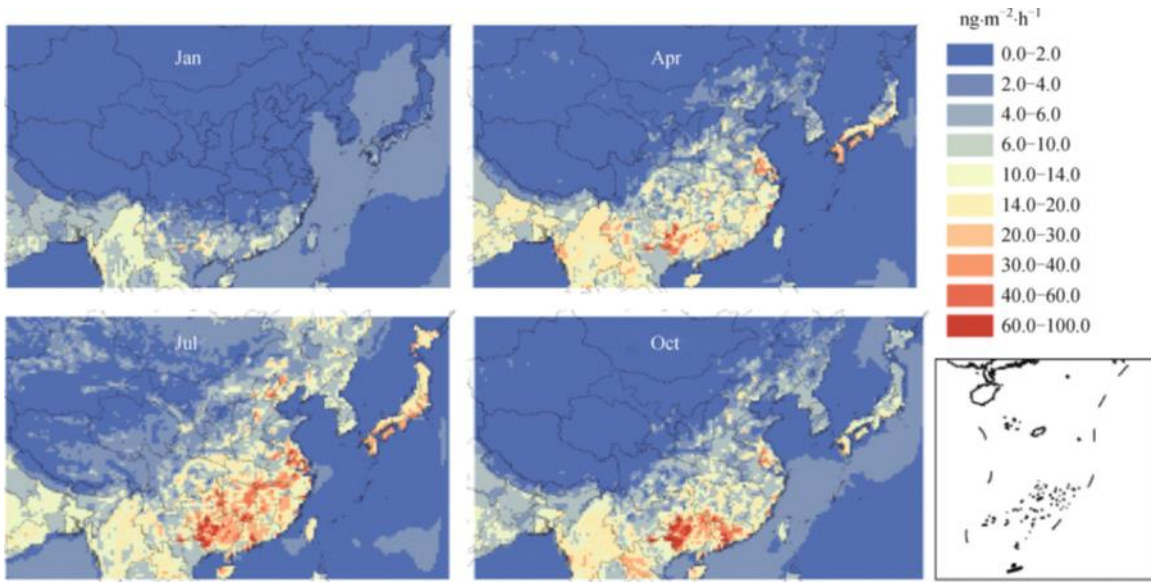

97  
 98  
 99  
 100  
 101  
 102

Figure S8. The simulated air-surfaces  $\text{Hg}^0$  fluxes in East Asia (Wang et al., 2014).



103 References

- 104 Du, B. Y., W. Q., Luo, Y., and Duan, L.: Field measurement of soil mercury emission in a Masson pine forest  
105 in Tieshanping, Chongqing in Southwestern China, *Huan jing ke xue= Huanjing kexue* / [bian ji, Zhongguo ke  
106 xue yuan huan jing ke xue wei yuan hui "Huan jing ke xue" bian ji wei yuan hui.], 35, 3830-3835, 2014.
- 107 Fang, F. M., Wang, Q. C., and Yin, J. H.: Mercury flux from urban soils and its potential factors (in Chinese),  
108 *Sheng Tai Huan Jing*, 3, 260-262, 2003.
- 109 Feng, X. B., Yan, H. Y., Wang, S. F., Qiu, G. L., Tang, S. L., Shang, L. H., Dai, Q. J., and Hou, Y. M.: Seasonal  
110 variation of gaseous mercury exchange rate between air and water surface over Baihua reservoir, Guizhou,  
111 China, *Atmospheric Environment*, 38, 4721-4732, 2004.
- 112 Feng, X. B., Wang, S. F., Qiu, G. A., Hou, Y. M., and Tang, S. L.: Total gaseous mercury emissions from soil in  
113 Guiyang, Guizhou, China, *Journal of Geophysical Research-Atmospheres*, 110, Artn D14306  
114 Doi 10.1029/2004jd005643, 2005.
- 115 Feng, X. B., Wang, S. F., Qiu, G. G., He, T. R., Li, G. H., Li, Z. G., and Shang, L. H.: Total gaseous mercury  
116 exchange between water and air during cloudy weather conditions over Hongfeng Reservoir, Guizhou, China,  
117 *Journal of Geophysical Research-Atmospheres*, 113, 2008.
- 118 Fu, X. W., Feng, X. B., and Wang, S. F.: Exchange fluxes of Hg between surfaces and atmosphere in the eastern  
119 flank of Mount Gongga, Sichuan province, southwestern China, *Journal of Geophysical Research-  
120 Atmospheres*, 113, 2008.
- 121 Fu, X. W., Feng, X. B., Wan, Q., Meng, B., Yan, H. Y., and Guo, Y. N.: Probing Hg evasion from surface waters  
122 of two Chinese hyper/meso-eutrophic reservoirs, *Science of the Total Environment*, 408, 5887-5896, 2010.
- 123 Fu, X. W., Feng, X. B., Zhang, H., Yu, B., and Chen, L. G.: Mercury emissions from natural surfaces highly  
124 impacted by human activities in Guangzhou province, South China, *Atmospheric Environment*, 54, 185-193,  
125 2012.
- 126 Fu, X. W., Feng, X. B., Guo, Y. N., Meng, B., Yin, R. S., and Yao, H.: Distribution and production of reactive  
127 mercury and dissolved gaseous mercury in surface waters and water/air mercury flux in reservoirs on  
128 Wujiang River, Southwest China, *Journal of Geophysical Research-Atmospheres*, 118, 3905-3917, 2013a.
- 129 Fu, X. W., Feng, X. B., Yin, R. S., and Zhang, H.: Diurnal variations of total mercury, reactive mercury, and  
130 dissolved gaseous mercury concentrations and water/air mercury flux in warm and cold seasons from  
131 freshwaters of southwestern China, *Environmental Toxicology and Chemistry*, 32, 2256-2265, 2013b.
- 132 Fu, X. W., Zhang, H., Wang, X., Yu, B., Lin, C.-J., and Feng, X. B.: Observations of atmospheric mercury in  
133 China: a critical review, *Atmos. Chem. Phys. Discuss.*, 11925-11983, doi:10.5194/acpd-15-11925-2015, 2015.
- 134 Ma, M., Wang, D. Y., Sun, R. G., Shen, Y. Y., and Huang, L. X.: Gaseous mercury emissions from subtropical  
135 forested and open field soils in a national nature reserve, southwest China, *Atmospheric Environment*, 64,  
136 116-123, 2013.
- 137 Moore, C., and Carpi, A.: Mechanisms of the emission of mercury from soil: Role of UV radiation, *Journal of  
138 Geophysical Research-Atmospheres*, 110, 10.1029/2004jd005567, 2005.
- 139 Raychaudhuri, S.: INTRODUCTION TO MONTE CARLO SIMULATION, *Proceedings of the 2008 Winter  
140 Simulation Conference*, 91-100, 2008.
- 141 Shetty, S. K., Lin, C. J., Streets, D. G., and Jang, C.: Model estimate of mercury emission from natural sources  
142 in East Asia, *Atmospheric Environment*, 42, 8674-8685, DOI 10.1016/j.atmosenv.2008.08.026, 2008.
- 143 Sommar, J., Zhu, W., Shang, L. H., Feng, X. B., and Lin, C. J.: A whole-air relaxed eddy accumulation

144 measurement system for sampling vertical vapour exchange of elemental mercury, *Tellus Series B-Chemical*  
145 *and Physical Meteorology*, 65, Artn 19940  
146 Doi 10.3402/Tellusb.V65i0.19940, 2013.

147 Wang, D. Y., He, L., Shi, X. J., Wei, S. Q., and Feng, X. B.: Release flux of mercury from different environmental  
148 surfaces in Chongqing, China, *Chemosphere*, 64, 1845-1854, 2006.

149 Wang, S., Zhang, L., Wang, L., Wu, Q., Wang, F., and Hao, J.: A review of atmospheric mercury emissions,  
150 pollution and control in China, *Frontiers of Environmental Science & Engineering*, 8, 631-649,  
151 10.1007/s11783-014-0673-x, 2014.

152 Wang, S. F., Feng, X. B., Qiu, G. L., and Fu, X. W.: comparison of air/soil mercury exchange  
153 between warm and cold season in Hongfeng reservoir region, *Huan jing ke xue= Huanjing kexue*  
154 / [bian ji, *Zhongguo ke xue yuan huan jing ke xue wei yuan hui "Huan jing ke xue" bian ji wei yuan hui.*], 25,  
155 123-127, 2004.

156 Zhou, J., Feng, X. B., Liu, H. Y., Zhang, H., Fu, X. W., Bao, Z. D., Wang, X., and Zhang, Y. P.: Examination of total  
157 mercury inputs by precipitation and litterfall in a remote upland forest of Southwestern China, *Atmospheric*  
158 *Environment*, 81, 364-372, 2013.

159 Zhu, J., Wang, D., Liu, X., and Zhang, Y.: Mercury fluxes from air/surface interfaces in paddy field and dry  
160 land, *Applied Geochemistry*, 26, 10.1016/j.apgeochem.2010.11.025, 2011.

161 Zhu, J. S., Wang, D. Y., and Ma, M.: Mercury release flux and its influencing factors at the air-water interface  
162 in paddy field in Chongqing, China, *Chinese Science Bulletin*, 58, 266-274, 2013.

163 Zhu, W., Sommar, J., Lin, C. J., and Feng, X.: Mercury vapor air-surface exchange measured by collocated  
164 micrometeorological and enclosure methods - Part I: Data comparability and method characteristics,  
165 *Atmospheric Chemistry and Physics*, 15, 685-702, 2015.

166
